# Supplementary material for: Entry by multiple picornaviruses is dependent on a pathway that includes TNK2, WASL, and NCK1
Source: eLife. 2019 Nov 26;8:e50276. doi: 10.7554/eLife.50276 (PMC6904212; doi:10.7554/eLife.50276)
Supplement: Figure 1—source data 1. [file elife-50276-fig1-data1.xlsx]

## Sheet: Figure 1B-source data
	MOI 1 10h							Normalized to Ctrl
		Rep. 1	Rep. 2	Rep. 3	ave	stdev		Rep. 1	Rep. 2	Rep. 3	ave	stdev
Ctrl		0.541	0.554	0.504	0.533	0.0259422		101.501	103.94	94.5591	100	4.86721
TNK2 KO1		0.032	0.0317	0.0409	0.0348667	0.00522717		6.00375	5.94747	7.67355	6.54159	0.980708
TNK2 KO2		0.0798	0.067	0.0649	0.0705667	0.00806494		14.9719	12.5704	12.1764	13.2395	1.51312

## Sheet: Figure 1D-source data
	MOI 1 8 hpi							Normalized to Ctrl
		Rep. 1	Rep. 2	Rep. 3	AVE	STDEV		Rep. 1	Rep. 2	Rep. 3	AVE	STDEV
Ctrl		0.195	0.181	0.19	0.188667	0.0070946		103.339	95.9194	100.689	99.9823	3.75972
TNK2 KO1		0.0835	0.0834	0.0803	0.0824	0.00181934		44.2501	44.1971	42.5543	43.6672	0.964144
TNK2 KO2		0.102	0.101	0.0926	0.0985333	0.00516269		54.0541	53.5241	49.0726	52.2169	2.73592

## Sheet: Figure 1F-source data
	MOI 1 10 h							Normalized to DMSO
		Rep.1	Rep.2	Rep.3	AVE	STDEV		Rep.1	Rep.2	Rep.3	AVE	STDEV
DMSO		0.293	0.32	0.325	0.312667	0.0172143		93.7	102.335	103.933	99.9893	5.50506
0.05uM		0.313	0.314	0.355	0.327333	0.0239653		100.096	100.416	113.527	104.68	7.66398
0.2uM		0.17	0.246	0.248	0.221333	0.0444672		54.3652	78.6697	79.3092	70.7814	14.2204
0.8uM		0.16	0.195	0.196	0.183667	0.020502		51.1673	62.3601	62.6799	58.7357	6.55645
3.2uM		0.0399	0.0631	0.0509	0.0513	0.0116052		12.7598	20.1791	16.2776	16.4055	3.71128
