# Supplementary material for: Entry by multiple picornaviruses is dependent on a pathway that includes TNK2, WASL, and NCK1
Source: eLife. 2019 Nov 26;8:e50276. doi: 10.7554/eLife.50276 (PMC6904212; doi:10.7554/eLife.50276)
Supplement: Figure 2—source data 1. [file elife-50276-fig2-data1.xlsx]

## Sheet: Figure 2B-source data
	MOI 1 10h						normalized to Ctrl
	Rep. 1	Rep. 2	Rep. 3	ave	stdev		Rep. 1	Rep. 2	Rep. 3	ave	stdev
Ctrl	0.541	0.554	0.504	0.533	0.0259422		101.501	103.94	94.5591	100	4.86721
WASL KO	0.172	0.191	0.215	0.192667	0.0215484		32.2702	35.8349	40.3377	36.1476	4.04285

## Sheet: Figure 2D-source data
	MOI 1 8h						normalized to Ctrl
	Rep. 1	Rep. 2	Rep. 3	ave	stdev		Rep. 1	Rep. 2	Rep. 3	ave	stdev
Ctrl	0.398	0.373	0.394	0.388333	0.0134288		102.498	96.0597	101.468	100.009	3.45836
WASL KO	0.286	0.292	0.328	0.302	0.0227156		73.6544	75.1996	84.4708	77.7749	5.85002

## Sheet: Figure 2F-source data
							Normalized to DMSO
	Rep. 1	Rep. 2	Rep. 3	AVE	STDEV		Rep. 1	Rep. 2	Rep. 3	AVE	STDEV
DMSO	0.152	0.164	0.145	0.153667	0.00960902		98.5094	106.286	93.9728	99.5895	6.22749
0.312uM	0.132	0.133	0.15	0.138333	0.010116		85.5476	86.1957	97.2132	89.6522	6.55606
1.25uM	0.0867	0.101	0.104	0.0972333	0.00924464		56.1892	65.4569	67.4012	63.0158	5.99134
5uM	0.0302	0.034	0.0338	0.0326667	0.00213854		19.5723	22.035	21.9054	21.1709	1.38596

## Sheet: Figure 2H-source data
	EMCV MOI 1						Normalized to Ctrl
	Rep.1	Rep.2	Rep.3	ave	stdev		Rep.1	Rep.2	Rep.3	ave	stdev
ctrl	0.438	0.466	0.49	0.4647	0.0260256		94.25	100.28	105.44	99.99	5.6
NCK1 KO	0.207	0.255	0.251	0.2377	0.0266333		44.54	54.87	54.01	51.14	5.73	0.000455213

## Sheet: Figure 2J-source data
	CVB3 MOI 1 8 h						Normalized to Ctrl
	Rep.1	Rep.2	Rep.3	ave	stdev		Rep.1	Rep.2	Rep.3	ave	stdev
ctrl	0.438	0.466	0.49	0.464667	0.0260256		94.2544	100.28	105.444	99.9928	5.60052
NCK1 KO	0.207	0.255	0.251	0.237667	0.0266333		44.5449	54.8741	54.0133	51.1441	5.73129
