# Supplementary material for: Entry by multiple picornaviruses is dependent on a pathway that includes TNK2, WASL, and NCK1
Source: eLife. 2019 Nov 26;8:e50276. doi: 10.7554/eLife.50276 (PMC6904212; doi:10.7554/eLife.50276)
Supplement: Figure 3—source data 1. [file elife-50276-fig3-data1.xlsx]

## Sheet: Figure 3A-source data
EMCV								Normalized to Ctrl
	Rep. 1	Rep. 2	Rep. 3	ave	stdev			Rep. 1	Rep. 2	Rep. 3	ave	stdev
Ctrl	0.243	0.267	0.255	0.255	0.00404145			95.2941	104.706	100	100	1.58488
TNK2 KO	0.0481	0.048	0.037	0.0443667	0.00637992			18.8627	18.8235	14.5098	17.3987	2.50193
NCK1 KO	0.18	0.156	0.173	0.169667	0.0123423			70.5882	61.1765	67.8431	66.5359	4.84013
WASL KO	0.158	0.165	0.165	0.162667	0.012			61.9608	64.7059	64.7059	63.7908	4.70588
WN dko	0.1641	0.1586	0.168023	0.163574	0.00637992			64.3529	62.1961	65.8915	64.1468	2.50193
TN dko	0.0452	0.044	0.0418	0.0436667	0.00172434			17.7255	17.2549	16.3922	17.1242	0.67621
TW dko	0.0372	0.042	0.0319	0.0370333	0.00505206			14.5882	16.4706	12.5098	14.5229	1.9812
TNW tko	0.0491	0.0375	0.0366	0.0410667	0.00697161			19.2549	14.7059	14.3529	16.1046	2.73396

## Sheet: Figure 3C-source data
	TNK1 KO WASLL232P	TNK2KO WASL L235P	TNK2KO WASLY256E	TNK2KO fluc	TNK2 KO WASL	Ctrl fluc	Ctrl WASL	Normalized to Ctrl+fluc	TNK1 KO WASLL232P	TNK2KO WASL L235P	TNK2KO WASLY256E	TNK2KO fluc	TNK2 KO WASL	Ctrl fluc	Ctrl WASL
	0.162	0.158	0.124	0.0539	0.117	0.258	0.34		0.546743	0.533243	0.418495	0.18191	0.39487	0.870739	1.14749
	0.188	0.162	0.138	0.0551	0.101	0.291	0.378		0.634492	0.546743	0.465744	0.18596	0.340871	0.982113	1.27573
	0.185	0.146	0.127	0.0545	0.111	0.34	0.381		0.624367	0.492744	0.42862	0.183935	0.37462	1.14749	1.28586
ave	0.178333	0.155333	0.129667	0.0545	0.109667	0.296333	0.366333		0.601867	0.524243	0.43762	0.183935	0.37012	1.00011	1.23636
stdev	0.0142244	0.00832666	0.00737111	0.0006	0.0080829	0.0412593	0.0228546		0.0480067	0.0281021	0.0248772	0.00202497	0.0272795	0.139249	0.0771334

## Sheet: Figure 3D-source data
	NCK1KO WASLL232P	NCK1KO WASLL235P	NCK1KO WASLY256E	NCK1KO fluc	NCK1KO WASL	ctr fluc	ctrl WASL	Normalized to Ctrl fluc	NCK1KO WASLL232P	NCK1KO WASLL235P	NCK1KO WASLY256E	NCK1KO fluc	NCK1KO WASL	ctr fluc	ctrl WASL
	0.321	0.353	0.288	0.125	0.143	0.225	0.293		1.3248	1.45687	1.18861	0.515889	0.590177	0.928601	1.20924
	0.391	0.342	0.281	0.108	0.197	0.236	0.382		1.6137	1.41147	1.15972	0.445728	0.813042	0.973999	1.57656
	0.346	0.376	0.357	0.0929	0.163	0.266	0.39		1.42798	1.5518	1.47338	0.383409	0.67272	1.09781	1.60957
ave	0.352667	0.357	0.308667	0.108633	0.167667	0.242333	0.355		1.4555	1.47338	1.2739	0.448342	0.69198	1.00014	1.46513
stdev	0.035473	0.0173494	0.042004	0.0160594	0.0273008	0.0212211	0.0538424		0.146401	0.0716028	0.173355	0.0662789	0.112674	0.0875818	0.222214
