# Supplementary material for: Entry by multiple picornaviruses is dependent on a pathway that includes TNK2, WASL, and NCK1
Source: eLife. 2019 Nov 26;8:e50276. doi: 10.7554/eLife.50276 (PMC6904212; doi:10.7554/eLife.50276)
Supplement: Figure 4—source data 1. [file elife-50276-fig4-data1.xlsx]

## Sheet: Figure 4B-source data
	MOI 1 10 h			AVE	STDEV		Normalized to DMSO				AVE	STDEV
DMSO	0.421	0.411	0.374	0.402	0.0247588		DMSO	104.726	102.239	93.0348	100	6.15891
3.2uM	0.0865	0.0664	0.0598	0.0709	0.0139072		3.2uM	21.5174	16.5174	14.8756	17.6368	3.4595
3.2uM 1h	0.377	0.454	0.376	0.402333	0.0447474		3.2uM 1h	93.7811	112.935	93.5323	100.083	11.1312
3.2uM 2h	0.411	0.396	0.39	0.399	0.0108167		3.2uM 2h	102.239	98.5075	97.0149	99.2537	2.69071
3.2uM 3h	0.372	0.433	0.381	0.395333	0.0329292		3.2uM 3h	92.5373	107.711	94.7761	98.3416	8.19135
