# Supplementary material for: Entry by multiple picornaviruses is dependent on a pathway that includes TNK2, WASL, and NCK1
Source: eLife. 2019 Nov 26;8:e50276. doi: 10.7554/eLife.50276 (PMC6904212; doi:10.7554/eLife.50276)
Supplement: Figure 5—source data 1. [file elife-50276-fig5-data1.xlsx]

## Sheet: Figure 5B-source data
EMCV	moi 1	Pirl-1					Normalized to DMSO
	DMSO	1.25 uM	2.5 uM	5 uM	10 uM		DMSO	1.25 uM	2.5 uM	5 uM	10 uM
	0.489	0.497	0.492	0.469	0.25		97.9371	99.5394	98.538	93.9315	50.0701
	0.504	0.501	0.509	0.434	0.275		100.941	100.34	101.943	86.9217	55.0771
	0.505	0.464	0.489	0.483	0.291		101.142	92.9301	97.9371	96.7354	58.2816
ave	0.499333	0.487333	0.496667	0.462	0.272		100.007	97.6033	99.4726	92.5295	54.4763
stdev	0.00896289	0.020306	0.0107858	0.0252389	0.020664		1.79509	4.06689	2.16018	5.05485	4.13859
