# Supplementary material for: Entry by multiple picornaviruses is dependent on a pathway that includes TNK2, WASL, and NCK1
Source: eLife. 2019 Nov 26;8:e50276. doi: 10.7554/eLife.50276 (PMC6904212; doi:10.7554/eLife.50276)
Supplement: Figure 6—source data 1. [file elife-50276-fig6-data1.xlsx]

## Sheet: Figure 6B-source data
	WASLKO deltaWH1	WASL deltaBP	WASLKO deltaPR	WASLKO deltaGB	WASLKO deltaA	WASLKO WASL	WASLko Fluc	Ctrl WASL	Ctrl Fluc	Normalized to Ctrl fluc	WASLKO deltaWH1	WASL deltaBP	WASLKO deltaPR	WASLKO deltaGB	WASLKO deltaA	WASLKO WASL	WASLko Fluc	Ctrl WASL	Ctrl Fluc
	0.313	0.0884	0.11	0.1	0.0976	0.136	0.0536	0.15	0.107		2.91705	0.823858	1.02516	0.931966	0.909599	1.26747	0.499534	1.39795	0.997204
	0.317	0.0953	0.104	0.0835	0.0765	0.114	0.0639	0.155	0.101		2.95433	0.888164	0.969245	0.778192	0.712954	1.06244	0.595527	1.44455	0.941286
	0.335	0.0845	0.0955	0.0841	0.0826	0.14	0.0706	0.196	0.114		3.12209	0.787512	0.890028	0.783784	0.769804	1.30475	0.657968	1.82665	1.06244
ave	0.321667	0.0894	0.103167	0.0892	0.0855667	0.13	0.0627	0.167	0.107333		2.99783	0.833178	0.961479	0.831314	0.797453	1.21156	0.584343	1.55638	1.00031
stdev	0.0117189	0.005469	0.00728583	0.00935788	0.0108583	0.014	0.00856329	0.0252389	0.00650641		0.109217	0.0509693	0.0679015	0.0872123	0.101196	0.130475	0.079807	0.235218	0.0606375

## Sheet: Figure 6D-source data
EMCV	moi 1	CK869					Normalized to DMSO
	DMSO	10 uM	20 uM	40 uM	80 uM		DMSO	10uM	20uM	40uM	80uM
	0.415	0.357	0.318	0.157	0.0308		99.1163	85.2639	75.9494	37.497	7.3561
	0.424	0.371	0.312	0.174	0.0271		101.266	88.6076	74.5164	41.5572	6.47241
	0.417	0.345	0.322	0.16	0.0259		99.594	82.3979	76.9047	38.2135	6.18581
ave	0.418667	0.357667	0.317333	0.163667	0.0279333		99.992	85.4231	75.7901	39.0892	6.67144
stdev	0.00472582	0.0130128	0.00503322	0.00907377	0.00255408		1.12869	3.10791	1.20211	2.16713	0.610003
