# Supplementary material for: Entry by multiple picornaviruses is dependent on a pathway that includes TNK2, WASL, and NCK1
Source: eLife. 2019 Nov 26;8:e50276. doi: 10.7554/eLife.50276 (PMC6904212; doi:10.7554/eLife.50276)
Supplement: Figure 7—source data 1. — Source data for Figure 7C: FACS quantification of virus infected cells; Source data for Figure 7E: death report for EMCV-infected mice; Source data for Figure 7F and G: virus titer in EMCV-infected mouse brain and heart. [file elife-50276-fig7-data1.xlsx]

## Sheet: Figure 7C-source data
	WT	Tnk2 ko			WT	Tnk2 ko
MOI 1	0.243	0.152		Normalized to WT	99.1837	62.0408
	0.254	0.169			103.673	68.9796
	0.238	0.148			97.1429	60.4082
ave	0.245	0.156333			100	63.8095
stdev	0.00818535	0.0111505			3.34096	4.55122

## Sheet: Figure 7E-source data
Day censored	WT	TNK2 KO
2	1
3	1
3	1	1
4	1
4	1	1
6		1
6		1
7	1
7	1
9		1
21		0
21		0
21		0
21		0
21		0
21		0
1: event of death
0: suvivor

## Sheet: Figure 7F-source data
Mouse no.	Genotype	Titer
6718	KO	0
6725	KO	0
6726	KO	50
6728	KO	0
6729	KO	0
6748	KO	0
6750	KO	0
6761	KO	25
6762	KO	25
6763	KO	0
6767	KO	0
6774	KO	375
6775	KO	75
6784	KO	0
6785	KO	0
6796	KO	125
6716	WT	0
6721	WT	4000
6722	WT	0
6747	WT	50
6749	WT	0
6751	WT	7750000
6770	WT	50
6772	WT	125
6776	WT	0
6777	WT	75
6795	WT	2750000
6797	WT	1250000
6798	WT	1700000
6800	WT	0

## Sheet: Figure 7G-source data
Mouse No.	Genotype	Titer
6718	KO	0
6725	KO	0
6726	KO	0
6728	KO	925
6729	KO	0
6748	KO	625
6750	KO	0
6761	KO	0
6762	KO	0
6763	KO	0
6767	KO	0
6774	KO	3750
6775	KO	25
6784	KO	0
6785	KO	0
6796	KO	750
6716	WT	0
6721	WT	67500
6722	WT	7.5
6747	WT	0
6749	WT	0
6751	WT	45000
6770	WT	725
6772	WT	55000
6776	WT	0
6777	WT	50
6795	WT	102500
6797	WT	4000
6798	WT	5250
6800	WT	190
