# Supplementary material for: Entry by multiple picornaviruses is dependent on a pathway that includes TNK2, WASL, and NCK1
Source: eLife. 2019 Nov 26;8:e50276. doi: 10.7554/eLife.50276 (PMC6904212; doi:10.7554/eLife.50276)
Supplement: Supplementary file 1. [file elife-50276-supp1.xlsx]

## Sheet: Sheet1
Number	Name	Sequence(5'-----------------------------------------------------3')	Usage
P1	TNK2SG1F	CACCGGTTCAGTGGAAAGCGACTGG	Top strand for TNK2 CRIPSR single guide RNA1
P2	TNK2SG1R	AAACCCAGTCGCTTTCCACTGAACC	Bottom strand for TNK2 CRIPSR single guide RNA1
P3	TNK2SG2F	CACCGCGGTCCAACAACGATCCCAG	Top strand for TNK2 CRIPSR single guide RNA2
P4	TNK2SG2R	AAACCTGGGATCGTTGTTGGACCGC	Bottom strand for TNK2 CRIPSR single guide RNA2
P5	HJ255_WASLSG2F	CACCGTTTGTATATAATAGTCCTAG	Top strand for WASL CRIPSR single guide RNA
P6	HJ256_WASLSG2R	AAACCTAGGACTATTATATACAAAC	Bottom strand for WASL CRIPSR single guide RNA
P7	ST001_NCK1SGRNA_F	CACCGGAACCCACATGGTCACCCAA	Top strand for NCK1 CRIPSR single guide RNA
P8	ST002_NCK1SGRNA_R	AAACTTGGGTGACCATGTGGGTTCC	Bottom strand for NCK1 CRISPR single guide RNA
P9	HJ378_TNK2 FOR	CCGGCGCGCCATGCAGCCAGAGGAGGGCACA	Forward primer for cloning TNK2 isoform1
P10	HJ379_TNK2 REV	TCACCGGTTCAGCGCTTGTGGTGGGCAG	Reverse primer for cloning TNK2 isoform1
P11	HJ379_TNK2SG2MUT1	CGGTCCAACAACGAGCCTAAAGGTGCCAGCTCTGTCAC	Forward primer for mutating TNK2 sgRNA2 target site
P12	HJ380_TNK2SG2MUT2	GTGACAGAGCTGGCACCTTTAGGCTCGTTGTTGGACCG	Reverse primer for mutating TNK2 sgRNA2 target site
P13	HJ389_TNK2ISO2F	AACGTGGTGACCTCCGTGG	Forward primer for cloning TNK2 isoform2
P14	HJ390_TNK2ISO2R	TCACCGGTTCAGAGCCCCTTCGTCCTGGA	Reverse primer for cloning TNK2 isoform2
P15	HJ393_WASLSG2MUT1	CAGCAAAGGTATGAAAATATCCTCGCGGGCTATTATATACAAAGTTATTGTAT	Forward primer for mutating WASL sgRNA2 target site
P16	HJ394_WASLSG2MUT2	ATACAATAACTTTGTATATAATAGCCCGCGAGGATATTTTCATACCTTTGCTG	Reverse primer for mutating WASL sgRNA2 target site
P17	HJ395_WASL FOR	CCGGCGCGCCATGAGCTCCGTCCAGCAGCA	Forward primer for cloning WASL
P18	HJ396_WASL REV	TCACCGGTTCAGTCTTCCCACTCATCATCATC	Reverse primer for cloning WASL
P19	HJ406_VENECOF	GAAGGAATTCATGGTGAGCAAGGGCGAGGA	Forward primer for cloning Venus-WASL					Venus WASL
P20	HJ407_VENKPNR	ATGGTACCAGATCTGAGTCCGGACTTGTACAGCTCGTCCATGCCG	Reverse primer for cloning Venus-WASL
P21	HJ408_MCERECOR	GAAGGAATTCAGATCTGAGTCCGGACTTG	Reverse primer for cloning Cerulean-TNK2					Cerulean TNK2
P22	HJ409_VENBAMF	CTCGGATCCGATGGTGAGCAAGGGCGAGGA	Forward primer for cloning Venus-NCK1					Venus NCK1
P23	HJ410_VENNCOR	TAACCATGGTAGATCTGAGTCCGGACTTGTACAGCTCGTCCATGCCG	Reverse primer for cloning Venus-NCK1
P24	HJ413_HAWASECOF	AATTCATGTACCCATACGATGTTCCAGATTACGCTGGTAC	Forward primer for cloning HA-WASL
P25	HJ414_HAWASKPNR	CAGCGTAATCTGGAACATCGTATGGGTACATG	Reverse primer for cloning HA-WASL
P26	HJ415_MYCTNKECOF	AATTCATGGAACAAAAACTCATCTCAGAAGAGGATCTGG	Forward primer for cloning Myc-TNK2
P27	HJ416_MYCTNKECOR	AATTCCAGATCCTCTTCTGAGATGAGTTTTTGTTCCATG	Reverse primer for cloning Myc-TNK2
P28	T2-6SGRNA1	AlTR1/rArCrGrUrArGrCrCrGrGrUrCrCrArArCrArArCrGrGrUrUrUrUrArGrArGrCrUrArUrGrCrU/AlTR2	Alt-R® CRISPR-Cas9 crRNA targeting TNK2 for TNK2 CRISPR HDR
P29	Hs.Cas9.WASL.1.AB	AlTR1/rArCrCrUrUrUrUrGrGrGrCrCrGrUrCrGrArCrArArGrUrUrUrUrArGrArGrCrUrArUrGrCrU/AlTR2	Alt-R® CRISPR-Cas9 crRNA targeting WASL for TNK2 WASL dKO
P30	Hs.Cas9.NCK1.1.AG	AlTR1/rGrArArCrCrCrArCrArUrGrGrUrCrArCrCrCrArArGrUrUrUrUrArGrArGrCrUrArUrGrCrU/AlTR2	Alt-R® CRISPR-Cas9 crRNA targeting NCK1 for TNK2 NCK1 dKO, WASL NCK1 dKO and TNK2 WASL NCK1 tKO
P31	HJ419_T2-6SSODN	CACAGCGTAGCGGCTCAGAGTCCCCAGGAGGAAGTGGCCCTGGTGCTTACGTAGCCGGTCCAACAAGGAGCCTAGGGGTGCCAGCTCTGTCACCTGAGGCCACGTAGGAGGCAGGAGGAATGAGCTGGAGGACCCTGCCCCTTCTCAGCAGCCCACGCTGGGCCCCCAGT	DNA oligo template for TNK2 CRISPR HDR
P32	HJ420_WASL DEL REV	TCACCGGTTCATGAAGAATGAATGGCTTTGC	Reverse primer for cloning WASL actin binding domain deletion
P33	HJ421_TETTNK2-3MLU	TATACGCGTATGCTCGAGGCCCGGCC	Forward primer for cloning TNK2 isoform3
P34	HJ422_TETTNK2-3ECOR	ATAGAATTCGCCACCATGCTCGAGGCCCGGCC	Reverse primer for cloning TNK2 isoform3
P35	HJ423_EMCV FOR	CGATCACTATGCTTGCCGTT	Forward primer for EMCV qRT_PCR assay
P36	HJ424_EMCV REV	CCCTACCTCACGGAATGGG	Reverse primer for EMCV qRT_PCR assay
P37	HJ425_EMCV PROBE	AGAGCCGATCATATTCCTGCTTGCCA	Probe sequence for EMCV qRT_PCR assay
P38	HJ441_FCIVNCKF	TCGACTCTAGAGGATCCCGGCGCGCCATGGCAGAAGAAGTGGTG	Forward primer for cloning NCK1
P39	HJ442_FCIVNCKR	GGAGGGAGAGGGGCGGATCACCGGTTTATGATAAATGCTTGACAAGATATAATTTTTC	Reverse primer for cloning NCK1
P40	HJ443_GFPTNK2F	TAGCGAATTCGCCACCATGGAGA	Forward primer for cloning GFP-TNK2
P41	HJ444_GFPTNK2R	GTAACGCGTGGCTCCGGAACCGGTTTCTTC	Reverse primer for cloning GFP-TNK2
P42	HJ445_GFPWASLAGE1	AACCGGTTCCGGACTCAGATCTGGTACC	Forward primer for cloning GFP-WASL
P43	HJ446_GFPWASLMLU1	ACAACGCGTTCAGTCTTCCCACTCATCATCA	Reverse primer for cloning GFP-WASL
P44	CL023_NWASP_L232P_F	CCACACATATCGAAAAGGTTCTTCGGTTCTGGATCCAAATTATTCAGATC	Forward primer for mutating WASL L232P
P45	CL024_NWASP_L232P_R	GATCTGAATAATTTGGATCCAGAACCGAAGAACCTTTTCGATATGTGTGG	Reverse primer for mutating WASL L232P
P46	CL025_NWASP_L235P_F	AGATTCCACACATATCGAAAGGGTTCTTCAATTCTGGATCC	Forward primer for mutating WASL L235P
P47	CL026_NWASP_L235P_R	GGATCCAGAATTGAAGAACCCTTTCGATATGTGTGGAATCT	Reverse primer for mutating WASL L235P
P48	CL027_NWASP_Y256E_F	CACCTCCTGTTTTTTCAATAAAGTCCTCTATAACTTTTGATGTTTCTCTGTCTTTAAGTT	Forward primer for mutating WASL L256E
P49	CL028_NWASP_Y256E_R	AACTTAAAGACAGAGAAACATCAAAAGTTATAGAGGACTTTATTGAAAAAACAGGAGGTG	Reverse primer for mutating WASL L256E
P50	CL038_WASL-AGEI	CGGATCACCGGTTCAGTCTT	Reverse primer for WASL domain deletion by overlapping PCR
P51	CL039_ASCI-WASL	TTAGACGAAGCTTGGGCTG	Forward primer for WASL domain deletion by overlapping PCR
P52	CL040_WASL-DWH1_1R	CCCAAAAGGTCTGTCATAGTCACACATTTCTTGCCG	Reverse primver paired with CL039 for WASL WH1 domain deletion. Overlaps with CL041.
P53	CL041_WASL-DWH1_2F	AATGTGTGACTATGACAGACCTTTTGGGCCGTCG	Reverse primver paired with CL038 for WASL WH1 domain deletion. Overlaps with with CL040.
P54	CL042_WASL-DBR_1R	ATCTGCCTTGGTGGTATGGGAGATGTTGTTGAC	Reverse primver paired with CL039 for WASL BR domain deletion. Overlaps with CL044.
P55	CL043_WASL-DBR_2F	ATCTCCCATACCACCAAGGCAGATATAGGAACAC	Reverse primver paired with CL038 for WASL BR domain deletion. Overlaps with with CL043.
P56	CL044_WASL-DGBD_1R	GTATTTGGATCCCAATCTGCCTTGGTTAATCTCTTC	Reverse primver paired with CL039 for WASL GBD domain deletion. Overlaps with CL045.
P57	CL045_WASL-DGBD_2F	TAACCAAGGCAGATTGGGATCCAAATACAGGCTTTG	Reverse primver paired with CL038 for WASL GBD domain deletion. Overlaps with with CL044.
P58	CL046_WASL-DPR_1R	TGCGGAGGCAAGCATCTGATGGGGACCATCAGGTTC	Reverse primver paired with CL039 for WASL PR domain deletion. Overlaps with CL045.
P59	CL047_WASL-DPR_2F	CGGAGGCAAGCATCTGATGGGGACCATCAGGTTC	Reverse primver paired with CL038 for WASL PR domain deletion. Overlaps with with CL044.
